# Supplementary material
Source: publisher figshare collection journal article supplement (https://tandf.figshare.com/ndownloader/files/14939996)
Supplement: Supplementary file 1 [file 14939996]

**
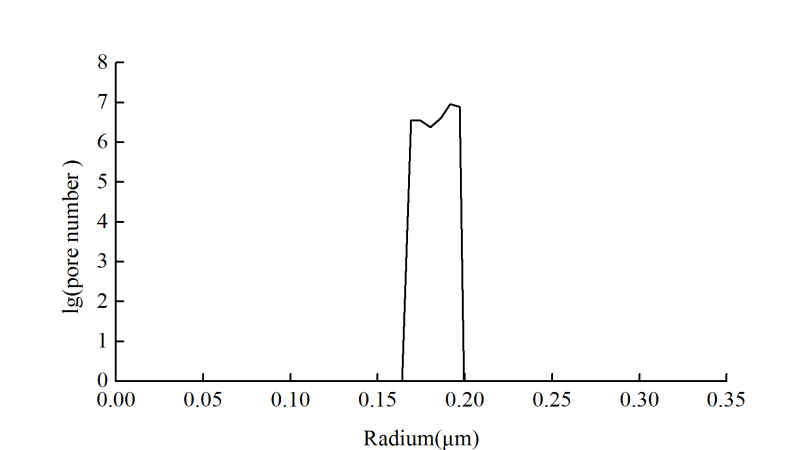
**

the pore size distribution of PES membrane

**
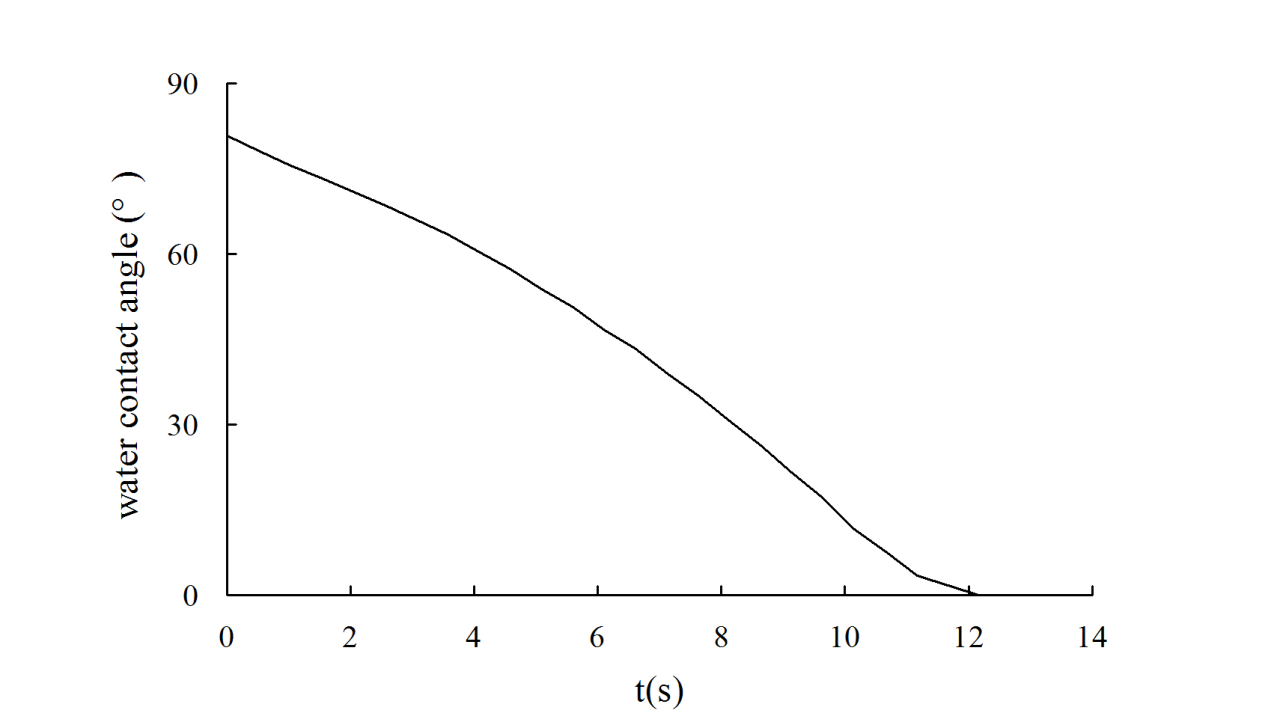
**

the water contact angle of PES membrane

**

**






 the lower surfaces( BSA) the cross sections-1 ( BSA)


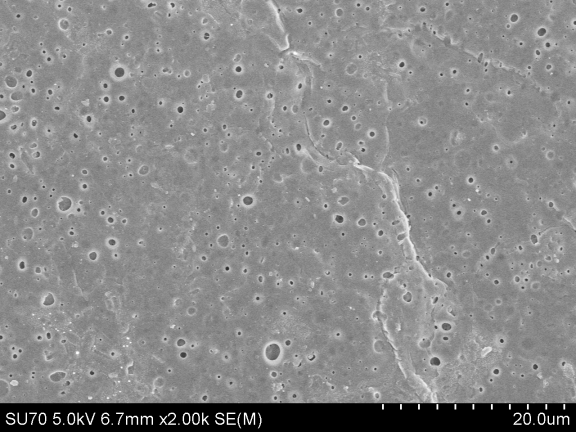
**
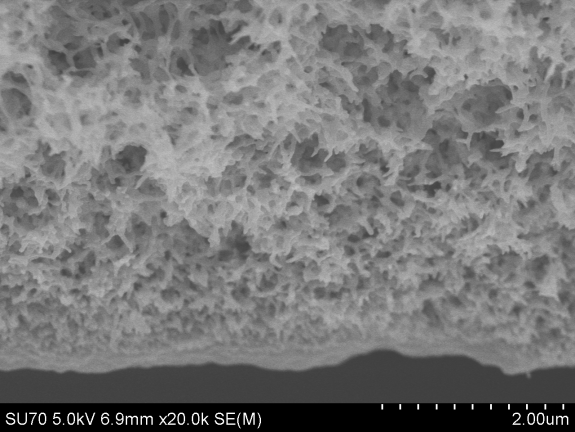
** the cross sections-2( BSA) the cross sections-3(BSA)

the cross sections-4(BSA) the lower surfaces(L-glutathione)







the cross sections-1 (L-glutathione) the cross sections-2 (L-glutathione)

**
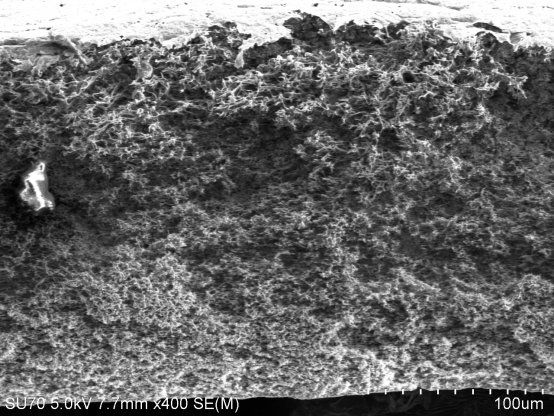

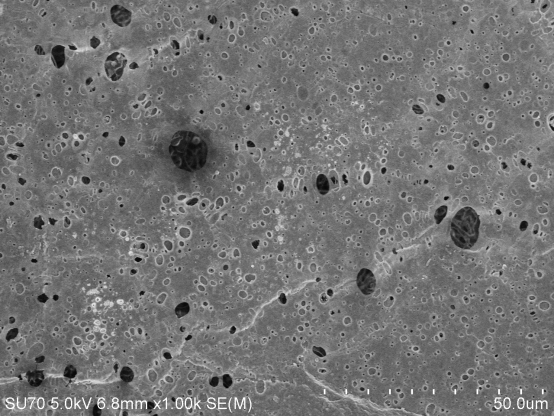
**
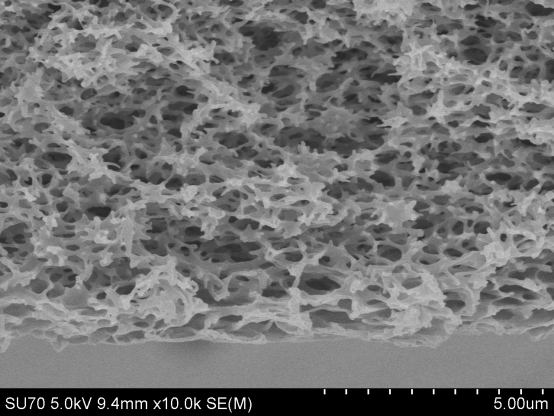
**
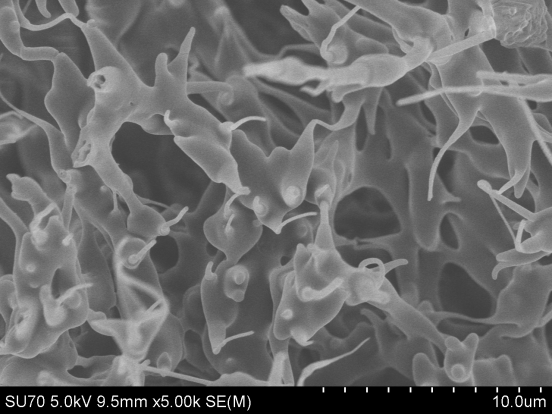
** the cross sections-3(L-glutathione) the cross sections-4(L-glutathione)

the lower surfaces (maltodextrin) the cross sections-1(maltodextrin)

**


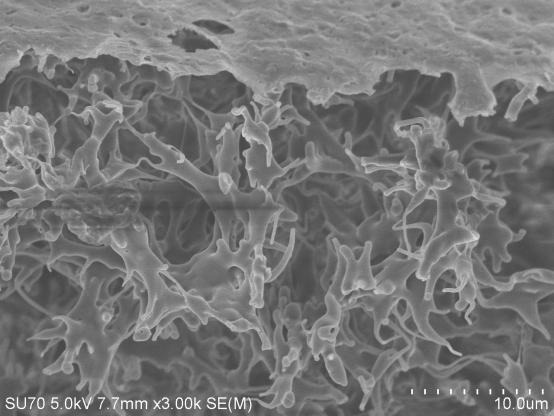
**

the cross sections-2 (maltodextrin)  the cross sections-3 (maltodextrin)

**
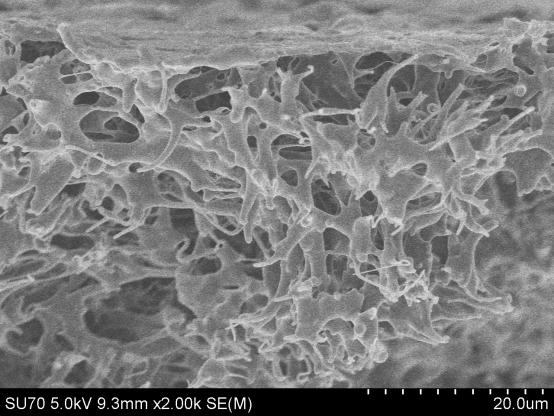

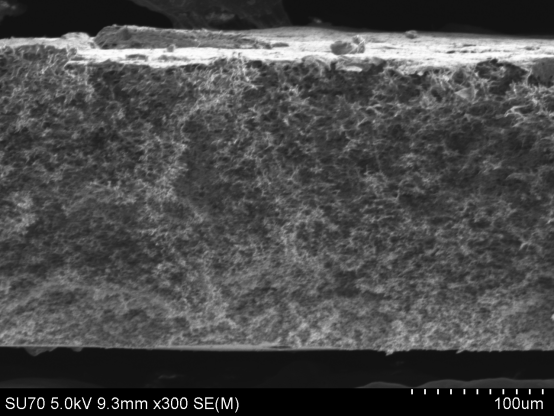

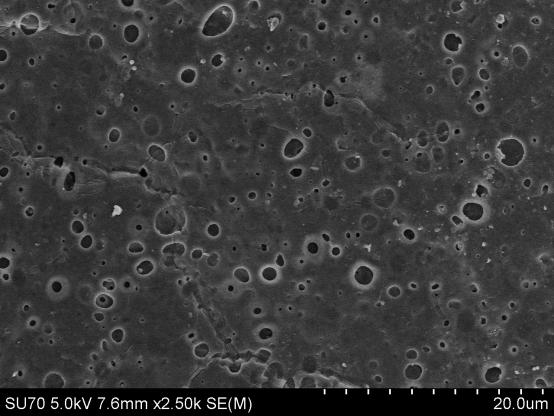

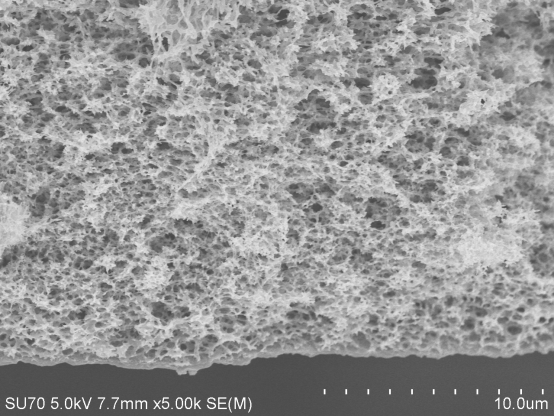
** the cross sections-4 (maltodextrin) the lower surfaces (sucrose)

the cross sections-1 (sucrose) the cross sections-2 (sucrose)

**\**

**
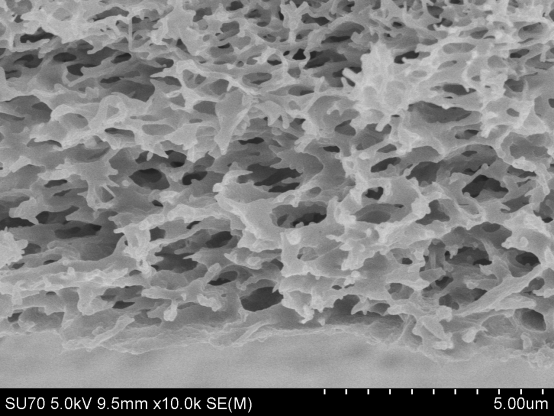

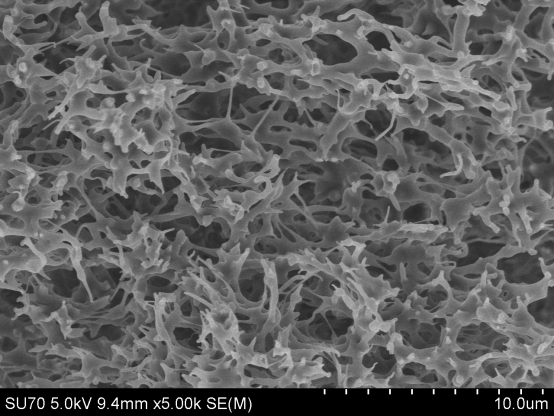
**  the cross sections-3 (sucrose) the cross sections-4 (sucrose)

**



**

**
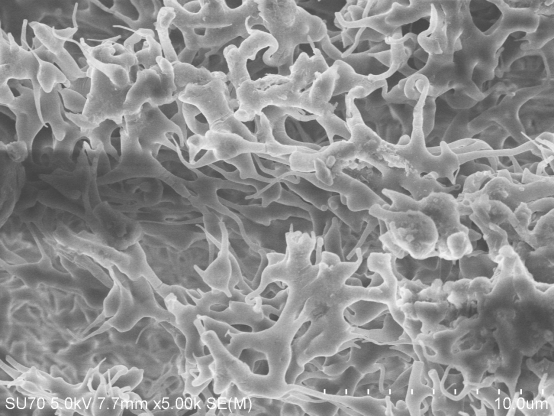


**the lower surfaces (glycerol triacetate) the cross sections-1 (glycerol triacetate)

the cross sections-2 (glycerol triacetate) the cross sections-3 (glycerol triacetate)

**

**

the cross sections-4 (glycerol triacetate)
